# Supplementary material for: A methodological framework for improving the performance of data-driven models: a case study for daily runoff prediction in the Maumee domain, USA
Source: Copernicus journal article supplement (doi:10.5194/gmd-16-1925-2023), 2023-04-06
Supplement: Supplementary file 1 [file gmd-16-1925-2023-supplement.pdf]

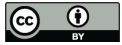

*Supplement of*

**A methodological framework for improving the performance of data-driven models: a case study for daily runoff prediction in the Maumee domain, USA**

**Yao Hu et al.**

*Correspondence to:* Yao Hu (yao.hu@udel.edu)

The copyright of individual parts of the supplement might differ from the article licence.

## **Contents of this file**

Tables S1 to S2

## **Introduction**

The supplementary information contains the list of 72 candidate variables from NOAA's NWM (Table S1), among which we selected seven influential variables for the Maumee Domain (Table S2).

**Table S1.** List of candidate variables from the National Water Model.

| No. | Variable Name | Definition                                              | Units               |
|-----|---------------|---------------------------------------------------------|---------------------|
| 1.  | SWFORC        | Shortwave radiation forcing                             | $W m^{-2}$          |
| 2.  | LWFORC        | Longwave radiation forcing                              | $W m^{-2}$          |
| 3.  | RAINRATE      | Precipitation in model timestep                         | $mm s^{-1}$         |
| 4.  | EMISS         | Emissivity: grid-average                                | -                   |
| 5.  | FSA           | Total absorbed SW radiation                             | $W m^{-2}$          |
| 6.  | FIRA          | Total net LW radiation (+ to atmosphere)                | $W m^{-2}$          |
| 7.  | HFX           | Sensible heat flux: grid-average (+ to atmosphere)      | $W m^{-2}$          |
| 8.  | LH            | Latent heat flux: grid-average (+ to atmosphere)        | $W m^{-2}$          |
| 9.  | EDIR          | Direct soil evaporation rate                            | $kg m^{-2} hr^{-1}$ |
| 10. | ETRAN         | Transpiration rate                                      | $kg m^{-2} hr^{-1}$ |
| 11. | ZWT           | Depth to the water table                                | m                   |
| 12. | WA            | Water in aquifer                                        | $kg m^{-2}$         |
| 13. | WT            | Water in aquifer and saturated soil                     | $kg m^{-2}$         |
| 14. | TR            | Transpiration heat flux                                 | $W m^{-2}$          |
| 15. | IRG           | Ground net longwave radiation                           | $W m^{-2}$          |
| 16. | SHG           | Ground sensible heat                                    | $W m^{-2}$          |
| 17. | EVG           | Ground evaporation heat                                 | $W m^{-2}$          |
| 18. | SAG           | Solar radiation absorbed by the ground                  | $W m^{-2}$          |
| 19. | IRB           | Net emitted longwave radiation by the bare ground       | $W m^{-2}$          |
| 20. | SHB           | Sensible heat flux by the bare ground to the atmosphere | $W m^{-2}$          |
| 21. | EVB           | Latent heat flux by the bare ground to the atmosphere   | $W m^{-2}$          |
| 22. | TRAD          | Surface radiative temperature                           | K                   |
| 23. | TG            | Ground temperature                                      | K                   |
| 24. | TGV           | Ground temperature with vegetated ground                | K                   |

|     |          |                                                        |                                |
|-----|----------|--------------------------------------------------------|--------------------------------|
| 25. | TGB      | Ground temperature with bare ground                    | K                              |
| 26. | T2MV     | 2m temperature with vegetated ground                   | K                              |
| 27. | Q2MV     | 2m mixing ratio with vegetated ground                  | kg kg <sup>-1</sup>            |
| 28. | ZSNSO_SN | Snow layer depths from snow surface                    | m                              |
| 29. | SNICE    | Snow layer ice                                         | mm                             |
| 30. | SNLIQ    | Snow later liquid water                                | mm                             |
| 31. | SOIL_T1  | Soil temperature at the top layer                      | K                              |
| 32. | SOIL_T2  | Soil temperature at layer 2                            | K                              |
| 33. | SOIL_T3  | Soil temperature at layer 3                            | K                              |
| 34. | SOIL_T4  | Soil temperature at the bottom layer                   | K                              |
| 35. | SOIL_W1  | Liquid volumetric soil temperature at the top layer    | m <sup>3</sup> m <sup>-3</sup> |
| 36. | SOIL_W2  | Liquid volumetric soil temperature at layer 2          | m <sup>3</sup> m <sup>-3</sup> |
| 37. | SOIL_W3  | Liquid volumetric soil temperature at layer 3          | m <sup>3</sup> m <sup>-3</sup> |
| 38. | SOIL_W4  | Liquid volumetric soil temperature at the bottom layer | m <sup>3</sup> m <sup>-3</sup> |
| 39. | SNOW_T   | Snow temperature                                       | K                              |
| 40. | SNOWH    | Snow depth                                             | m                              |
| 41. | SNEQV    | Snow water equivalent                                  | kg m <sup>-2</sup>             |
| 42. | QSNOW    | Snowfall rate at the surface                           | mm hr <sup>-1</sup>            |
| 43. | ISNOW    | Number of snow layers                                  | -                              |
| 44. | FSNO     | Fraction of surface covered with snow                  | fraction                       |
| 45. | ACSNOW   | Accumulated snowfall                                   | mm                             |
| 46. | ACSNOM   | Accumulated melting water out of snow bottom           | mm                             |
| 47. | CM       | Momentum drag coefficient                              | -                              |
| 48. | CH       | Grid average sensible heat exchange coefficient        | -                              |
| 49. | CHV      | Exchange coefficient from vegetation to atmosphere     | m hr <sup>-1</sup>             |
| 50. | CHB      | Exchange coefficient from the bare ground              | m hr <sup>-1</sup>             |
| 51. | CHLEAF   | Exchange coefficient from leaf surface                 | m hr <sup>-1</sup>             |

|     |             |                                                              |                                                   |
|-----|-------------|--------------------------------------------------------------|---------------------------------------------------|
| 52. | CHUC        | Exchange coefficient from below the canopy                   | $\text{m hr}^{-1}$                                |
| 53. | CHV2        | Exchange coefficient from the vegetation to atmosphere at 2m | $\text{m hr}^{-1}$                                |
| 54. | CHB2        | Exchange coefficient from the bare ground at 2m              | $\text{m hr}^{-1}$                                |
| 55. | RTMASS      | Root carbon mass                                             | $\text{g C m}^{-2}$                               |
| 56. | STMASS      | Stem carbon mass                                             | $\text{g C m}^{-2}$                               |
| 57. | WOOD        | Wood and woody roots carbon mass                             | $\text{g C m}^{-2}$                               |
| 58. | NEE         | Net ecosystem exchange                                       | $\text{g m}^{-2} \text{hr}^{-1}$<br>$\text{CO}_2$ |
| 59. | GPP         | Net instantaneous carbon assimilation                        | $\text{g m}^{-2} \text{hr}^{-1} \text{C}$         |
| 60. | ACCET       | Accumulated total evapotranspiration                         | mm                                                |
| 61. | SOILICE     | Fraction of soil moisture that is ice                        | fraction                                          |
| 62. | SOILSAT     | Fraction of soil saturation, column integrated               | fraction                                          |
| 63. | SNOWT_AVG   | Average snow temperature (by layer mass)                     | K                                                 |
| 64. | ZWATTABLRT  | Depth of saturated layers                                    | m                                                 |
| 65. | QBDRYRT     | Accumulated flow volume routed outside of the domain         | mm                                                |
| 66. | SFHEADSUBRT | Depth of ponded water on the surface                         | mm                                                |
| 67. | QQSFC_ACC   | Accumulated depth of surface water leaving a cell            | mm                                                |
| 68. | SOIL_M1     | Volumetric soil moisture in the top layer                    | $\text{m}^3 \text{m}^{-3}$                        |
| 69. | SOIL_M2     | Volumetric soil moisture in layer 2                          | $\text{m}^3 \text{m}^{-3}$                        |
| 70. | SOIL_M3     | Volumetric soil moisture in layer 3                          | $\text{m}^3 \text{m}^{-3}$                        |
| 71. | SOIL_M4     | Volumetric soil moisture in the bottom layer                 | $\text{m}^3 \text{m}^{-3}$                        |
| 72. | ALBEDO      | Surface albedo                                               | -                                                 |

**Table S2.** Influential variables for the Maumee Domain.

| <b>No</b> | <b>Variables</b> | <b>Definition</b>                                      | <b>Units</b>                                   |
|-----------|------------------|--------------------------------------------------------|------------------------------------------------|
| 1         | RAINRATE         | Daily Precipitation                                    | mm d <sup>-1</sup>                             |
| 2         | ACSNOM           | Daily accumulated melting water out of snow bottom     | mm d <sup>-1</sup>                             |
| 3         | SFHEADSUBRT      | Daily average depth of ponded water on the surface     | mm d <sup>-1</sup>                             |
| 4         | FIRA             | Total net LW radiation (+ to atmosphere) per day       | W m <sup>-2</sup> d <sup>-1</sup>              |
| 5         | SOIL_T4          | Daily average soil temperature at the bottom layer     | K d <sup>-1</sup>                              |
| 6         | SOIL_M3          | Daily average volumetric soil moisture in layer 3      | m <sup>3</sup> m <sup>-3</sup> d <sup>-1</sup> |
| 7         | SOILSAT          | Fraction of soil saturation, column integrated per day | d <sup>-1</sup>                                |
